# Supplementary material for: Nutritional Preconditioning in Cancer Treatment in Relation to DNA Damage and Aging
Source: PubMed Central journal article supplement (PMC9037985; doi:10.1146/annurev-cancerbio-060820-090737), 2020-12-02
Supplement: NIHMS1748750-supplement-Supplemental_Material.pdf [file NIHMS1748750-supplement-Supplemental_Material.pdf]

Supplemental table 1 – Clinical trials studying implementation of nutritional preconditioning in cancer treatment being chemotherapy, surgery or radiotherapy. DR, dietary restriction; FMD, fasting-mimicking diet; KD, ketogenic diet; QoL, quality of life; STF, short-term fasting; NA, not available. \*Trials referred to in main text.

| Cancer type                                | Nutritional intervention | Effect on                    | Study focus                                               | Patient group               | Study name, description                                                                                                                | Study ID <sup>a</sup> | Location                    | Status             |
|--------------------------------------------|--------------------------|------------------------------|-----------------------------------------------------------|-----------------------------|----------------------------------------------------------------------------------------------------------------------------------------|-----------------------|-----------------------------|--------------------|
| Advanced or metastatic cancer              | KD                       | Tumor growth                 | Safety and tolerability of KD in advanced cancer patients | Male and female adults      | <b>Ketogenic Diet in Advanced Cancer</b>                                                                                               | NCT01716468           | Pennsylvania, USA, 1 center | Completed*         |
| Advanced LKB1-inactive lung adenocarcinoma | FMD +- metformin         | Tumor growth                 | Effect on progression-free survival                       | Male and female adults      | <b>Metformin Plus/Minus Fasting Mimicking Diet to Target the Metabolic Vulnerabilities of LKB1-inactive Lung Adenocarcinoma (FAME)</b> | NCT03709147           | Italy, 1 center             | Not yet recruiting |
| Brain tumour                               | Ketogenic diet           | Acute toxicity, Tumor growth | Feasibility, tolerability and tumour response             | Boys and girls up to 21 yrs | <b>Therapeutic Targeting of Sex Differences in Pediatric Brain Tumor Glycolysis</b>                                                    | NCT03591861           | Missouri, USA, 1 center     | Recruiting         |
| Breast cancer                              | Low-carb diet            | NA                           | Effect on aromatase inhibitor therapy                     | Adult females               | <b>BREADS: Breast Adjuvant Diet Study: &lt;20 g carbohydrates/day, 6 months</b>                                                        | NCT04189263           | California, USA, 1 center   | Recruiting         |
| Breast cancer                              | Low-fat diet             | Tumor growth                 | Effect on disease-free and overall survival               | Postmenopausal females      | <b>Nutrition Intervention in Treating Women With Breast Cancer: Total fat intake &lt;15% of calories</b>                               | NCT00002564           | USA, 37 centers             | Completed          |

|                               |                                         |                               |                                                                            |               |                                                                                                                                         |             |                             |                              |
|-------------------------------|-----------------------------------------|-------------------------------|----------------------------------------------------------------------------|---------------|-----------------------------------------------------------------------------------------------------------------------------------------|-------------|-----------------------------|------------------------------|
| Breast cancer                 | Low-carb diet                           | Tumor growth                  | Effect on preoperative endocrine prognostic index (PEPI)                   | Adult females | <b>NEOBREADS: Neoadjuvant Breast Diet Study (NEOBREADS):</b> <20 g carbohydrates/day, 6 months                                          | NCT03822715 | California, USA, 1 center   | Recruiting                   |
| Breast cancer                 | DR                                      | Tumor growth (Acute toxicity) | Evaluate feasibility of DR and effect on tumour progression                | Adult females | <b>Caloric Restriction in Treating Patients With Stage 0-I Breast Cancer Undergoing Surgery and Radiation Therapy (CAREFOR):</b> 25% CR | NCT01819233 | Pennsylvania, USA, 1 center | Completed, results available |
| Breast cancer                 | Low carb (ketogenic) diet, low fat diet | Tumor growth                  | Evaluation of proliferation and apoptosis markers                          | Adult females | <b>Comparison of Healthy Diets on Breast Cancer Markers (KetoBreast)</b>                                                                | NCT02744079 | New York, USA, 1 center     | Recruiting                   |
| Breast cancer                 | FMD                                     | Acute toxicity, Tumor growth  | Grade III/IV toxicity                                                      | Female adults | <b>Dietary Restriction as an Adjunct to Neoadjuvant ChemoTherapy for HER2 Negative Breast Cancer (DIRECT)</b>                           | NCT02126449 | The Netherlands, 15 centers | Completed                    |
| Breast cancer (HER2-positive) | Fasting                                 | Acute toxicity, Tumor growth  | Safety of fasting, decrease in chemo-induced side effects, tumor shrinkage | Female adults | <b>Fasting on Newly Diagnosed Breast Cancer (STEFNE):</b> fasting 24 h before and 24 h after chemotherapy                               | NCT02379585 | Arizona, USA, 1 center      | Terminated                   |
| Breast cancer                 | Fasting                                 | Acute toxicity                | Effect of STF on tolerance to adjuvant chemotherapy in                     | Female adults | <b>Effects of Short-term Fasting on Tolerance to Chemotherapy:</b> 24 h                                                                 | NCT01304251 | The Netherlands, 1 center   | Completed*                   |

|                                  |                                     |                               |                                                                            |                        |                                                                                                                                                                                                                |             |                           |                    |
|----------------------------------|-------------------------------------|-------------------------------|----------------------------------------------------------------------------|------------------------|----------------------------------------------------------------------------------------------------------------------------------------------------------------------------------------------------------------|-------------|---------------------------|--------------------|
|                                  |                                     |                               | breast cancer patients                                                     |                        | before and 24 h after chemotherapy                                                                                                                                                                             |             |                           |                    |
| Breast cancer                    | FMD +/- metformin                   | Tumor growth (Acute toxicity) | Effect on treatment response                                               | Female adults          | <b>Calorie Restriction With or Without Metformin in Triple Negative Breast Cancer (BREAKFAST):</b> every three weeks classical FMD                                                                             | NCT04248998 | Italy, 1 center           | Not yet recruiting |
| Breast cancer, ovarian cancer    | Fasting + vegan diet vs. vegan diet | Acute toxicity, Tumor growth  | Effect on Functional Assessment of Cancer Therapy - General (FACT-G) score | Adult females          | <b>Intermittent Fasting Accompanying Chemotherapy in Gynecological Cancers (FIT2):</b> Modified fasting 36-48h before and 24h after chemo 350-400 kcal per day. Between chemotherapies time-restricted feeding | NCT03162289 | Germany, 8 centers        | Recruiting         |
| Breast cancer                    | DR                                  | Acute toxicity                | Effect on heart function (anthracycline treatment)                         | Adult females          | <b>Caloric Restriction and Exercise for Protection From Anthracycline Toxic Effects (CREATE):</b> 50% CR for 48h. Also includes exercise arm                                                                   | NCT03131024 | Alberta, Canada, 1 center | Recruiting         |
| Breast cancer, colorectal cancer | FMD                                 | Tumor growth                  | Safety and feasibility of FMD                                              | Male and female adults | <b>Fasting-mimicking Diet in Patients Undergoing Active Cancer Treatment</b>                                                                                                                                   | NCT03595540 | Italy, 1 center           | Recruiting         |

|                                                    |     |                              |                                                                                                   |                        |                                                                                                                                                                                                             |             |                                        |                                  |
|----------------------------------------------------|-----|------------------------------|---------------------------------------------------------------------------------------------------|------------------------|-------------------------------------------------------------------------------------------------------------------------------------------------------------------------------------------------------------|-------------|----------------------------------------|----------------------------------|
| Breast cancer, melanoma                            | FMD | Tumor growth                 | Analysis of immunological and metabolic changes induced by FMD in pre- and post-operative setting | Male and female adults | <b>Impact of Dietary Intervention on Tumor Immunity: the DigesT Trial (DigesT)</b>                                                                                                                          | NCT03454282 | Italy, 1 center                        | Recruiting                       |
| Breast and prostate cancer                         | DR  | Acute toxicity, Tumor growth | Effect on toxicity and efficacy of chemotherapy                                                   | Male and female adults | <b>Controlled Low Calorie Diet in Reducing Side Effects and Increasing Response to Chemotherapy in Patients With Breast or Prostate Cancer:</b><br>3 d prior to chemo, 12 wks during chemo, 2 d after chemo | NCT01802346 | California & Minnesota, USA, 3 centers | Recruiting                       |
| Breast cancer, head and neck cancer, rectal cancer | KD  | Acute toxicity               | Effect of KD on body composition in patients undergoing RT                                        | Male and female adults | <b>Impact of a Ketogenic Diet Intervention During Radiotherapy on Body Composition (KETOCOMP):</b> One group received a ketogenic breakfast in the form of a drink, other group followed full KD            | NCT02516501 | Germany, 1 center                      | Recruiting, some data available* |
| Cancer                                             | FMD | Acute toxicity               | Safety of FMD                                                                                     | Male and female adults | <b>Safety, Feasibility and Metabolic Effects of the Fasting Mimicking Diet (FMD) in Cancer Patients</b>                                                                                                     | NCT03340935 | Italy, 1 center                        | Active, not recruiting           |

|                                                       |              |                              |                                                              |                                  |                                                                                                                                                                                                                                                                     |             |                           |                                                 |
|-------------------------------------------------------|--------------|------------------------------|--------------------------------------------------------------|----------------------------------|---------------------------------------------------------------------------------------------------------------------------------------------------------------------------------------------------------------------------------------------------------------------|-------------|---------------------------|-------------------------------------------------|
| Cancer patients receiving taxol/carboplatin treatment | FMD          | Acute toxicity               | Effect on nausea grade                                       | Male and female adults           | <b>Can Fasting Decrease the Side Effects of Chemotherapy?</b>                                                                                                                                                                                                       | NCT04027478 | California, USA, 1 center | Enrolling by invitation                         |
| Colorectal cancer                                     | STF          | Acute toxicity, Tumor growth | Effect on toxicity                                           | Male and female adults           | <b>Short-term Fasting as an Enhancer of Chemotherapy: Pilot Clinical Study on Colorectal Carcinoma Patients (CHEMOFAST):</b> 44-48h fast, start 24h before chemotherapy                                                                                             | NCT04247464 | Spain, 1 center           | Enrolling by invitation                         |
| Glioblastoma                                          | KD           | Tumor growth                 | Feasibility of KD                                            | Male and female adults           | <b>Ketogenic Diet for Recurrent Glioblastoma (ERGO)</b>                                                                                                                                                                                                             | NCT00575146 | Germany, 2 centers        | Completed*                                      |
| Glioblastoma                                          | KD + fasting | Tumor growth                 | Progression-free survival rates 6 months after reirradiation | Male and female adults           | <b>Calorie-restricted, Ketogenic Diet and Transient Fasting During Reirradiation for Patients With Recurrent Glioblastoma (ERGO2):</b> On day 1-3 and day 7-9, restriction of carbohydrates to < 60 g and of calories to 21-23 kcal/kg per day, on day 4-6 fasting. | NCT01754350 | Germany, 2 centers        | Completed, abstract oral presentation available |
| Glioblastoma                                          | KD           | Acute toxicity               | Adherence to KD                                              | Male and female adults (≥16 yrs) | <b>Ketogenic Diets as an Adjuvant Therapy in</b>                                                                                                                                                                                                                    | NCT03075514 | UK, 1 center              | Completed*                                      |

|                      |                      |                |                               |                        |                                                                                                                                                                                                                            |             |                          |                                 |
|----------------------|----------------------|----------------|-------------------------------|------------------------|----------------------------------------------------------------------------------------------------------------------------------------------------------------------------------------------------------------------------|-------------|--------------------------|---------------------------------|
|                      |                      |                |                               |                        | <b>Glioblastoma (KEATING):</b> Modified ketogenic diet (MKD): 80% fat and 5% carbohydrate of total kcal/day. Medium chain triglyceride (MCT) diet: 75% fat (30% of which medium chain fatty acids) and 5% carbohydrates.   |             |                          |                                 |
| Glioblastoma         | Energy-restricted KD | Tumor growth   | Change in brain tumor size    | Male and female adults | <b>Pilot Study of a Metabolic Nutritional Therapy for the Management of Primary Brain Tumors (Ketones)</b>                                                                                                                 | NCT01535911 | Michigan, USA, 1 center  | Active, not recruiting          |
| Gynecological cancer | Fasting              | Acute toxicity | QoL                           | Adult females          | <b>Short-Term Fasting During Chemotherapy in Patients With Gynecological Cancer- a Randomized Controlled Cross-over Trial (FIT):</b> Modified fasting (<400kcal/day) 36-48h before chemotherapy and 24h after chemotherapy | NCT01954836 | Germany, 1 center        | Completed*                      |
| Malignant neoplasm   | Fasting              | Acute toxicity | Safety and feasibility of STF | Male and female adults | <b>Short-Term Fasting Before Chemotherapy in</b>                                                                                                                                                                           | NCT01175837 | Minnesota, USA, 1 center | Completed; No results available |

|                                    |     |                                    |                                                                                                   |                        |                                                                                                                                            |             |                         |                          |
|------------------------------------|-----|------------------------------------|---------------------------------------------------------------------------------------------------|------------------------|--------------------------------------------------------------------------------------------------------------------------------------------|-------------|-------------------------|--------------------------|
|                                    |     |                                    |                                                                                                   |                        | <b>Treating Patients With Cancer:</b> 24 h fasting before chemotherapy, can be escalated to 36-48 h                                        |             |                         |                          |
| Non-small-cell lung cancer         | KD  | Tumor growth                       | Safety of KD during chemoradiation for lung cancer                                                | Male and female adults | <b>Ketogenic Diet With Chemoradiation for Lung Cancer (KETOLUNG)</b>                                                                       | NCT01419587 | Iowa, USA, 1 center     | Terminated, has results* |
| Non-small-cell lung cancer         | FMD | Tumor growth, Acute toxicity       | Effect on circulating tumor cells and its DNA damage                                              | Male and female adults | <b>Fasting-mimicking Diet With Chemo-immunotherapy in Non-small Cell Lung Cancer (NSCLC):</b><br>Plant-based FMD<br>~300 kcal/ fasting day | NCT03700437 | Indiana, USA, 3 centers | Recruiting               |
| Ovarian cancer, endometrial cancer | KD  | NA                                 | Changes in fasting glucose, fasting insulin and beta-hydroxybutyrate. Effect on body composition. | Adult females          | <b>Targeted Disruption to Cancer Metabolism and Growth Through Dietary Macronutrient Modification</b>                                      | NCT03171506 | Alabama, USA, 1 center  | Completed*               |
| Pancreatic cancer                  | KD  | Tumor growth                       | Frequency of adverse events                                                                       | Male and female adults | <b>Ketogenic Diet With Concurrent Chemoradiation for Pancreatic Cancer (KETOPAN)</b>                                                       | NCT01419483 | Iowa, USA, 1 center     | Terminated, has results* |
| Prostate cancer                    | FMD | Acute toxicity, 3 months after FMD | Changes in body weight, blood pressure, waist circumference and cholesterol levels                | Adult males            | <b>Fasting Mimicking Diet in Prostate Cancer and Metabolic Syndrome:</b> 3 cycles of 5 days FMD                                            | NCT04292041 | Ireland, 1 center       | Active, not recruiting   |

|                 |             |                |                                                                |                        |                                                                                                                                                                                                                                                                                                    |             |                              |                    |
|-----------------|-------------|----------------|----------------------------------------------------------------|------------------------|----------------------------------------------------------------------------------------------------------------------------------------------------------------------------------------------------------------------------------------------------------------------------------------------------|-------------|------------------------------|--------------------|
| Prostate cancer | Fasting/FMD | Acute toxicity | QoL, reduction of side effects, reduction in tumor progression | Adult males            | <b>Fasting and Nutritional Therapy in Patients With Advanced Metastatic Prostate Cancer:</b> 36 h before and 24 h after chemotherapy modified fasting (<400 kcal/day) or if fasting is not feasible FMD                                                                                            | NCT02710721 | Germany, 1 center            | Recruiting         |
| Sarcoma         | DR          | Surgery        | Effect on surgical wound complications                         | Male and female adults | <b>Effects Of Caloric Restriction On Post-Operative Complications In Sarcoma Patients Treated With Pre-Operative Radiation Therapy:</b> Nutritional supplement (Scandishake) providing 30% of caloric needs with 45% fat, 46% carbohydrates, 8% protein. Shake will be used 3 days before surgery. | NCT02792270 | Massachusetts, USA, 1 center | Not yet recruiting |
| Solid tumor     | Fasting     | Acute toxicity | Safety/feasibility of STF, toxicity profile                    | Male and female adults | <b>Short-Term Fasting: Impact on Toxicity:</b> 24, 48 or 72 hours fasting before platinum-based chemotherapy                                                                                                                                                                                       | NCT00936364 | California, USA, 1 center    | Recruiting         |



|                                                    |         |              |                                          |                        |                                                                                                                                                     |             |                             |                        |
|----------------------------------------------------|---------|--------------|------------------------------------------|------------------------|-----------------------------------------------------------------------------------------------------------------------------------------------------|-------------|-----------------------------|------------------------|
| Solid tumor                                        | Fasting | Tumor growth | Response to therapy                      | Male and female adults | <b>Short-term Starvation vs. Normal Diet Before Chemotherapy of Solid Tumors:</b> fasting 24 h before and 6 h after chemotherapy                    | NCT02607826 | Not provided                | Unknown                |
| Prostate cancer, endometrial cancer, breast cancer | DR      | Surgery      | Changes in expression of miR-21 in serum | Male and female adults | <b>Caloric Restriction Before Surgery in Treating Patients With Endometrial, Prostate, or Breast Cancer:</b> 25% DR for 3-12 weeks prior to surgery | NCT02983279 | Pennsylvania, USA, 1 center | Active, not recruiting |

<sup>a</sup> Study ID refers to clinical trials registered at [clinicaltrials.gov](https://clinicaltrials.gov)

Supplemental table 2 – Clinical trials implementing nutritional preconditioning to study a.o. cancer prevention. DR, dietary restriction.

| Subjects                                                                         | Nutritional intervention | Effect on                                                    | Patient group                           | Study name, description                                                                                                                                        | Study ID <sup>a</sup> | Location                 | Status    |
|----------------------------------------------------------------------------------|--------------------------|--------------------------------------------------------------|-----------------------------------------|----------------------------------------------------------------------------------------------------------------------------------------------------------------|-----------------------|--------------------------|-----------|
| Overweight subjects                                                              | DR                       | Aging and incidence of age-related diseases including cancer | Males and females between 25 - 50 years | <b>CALERIE (PBRC, Baton Rouge) - Comprehensive Assessment of Long-Term Effects of Reducing Intake of Energy:</b> 6 months of DR                                | NCT00099151           | USA, 3 centers           | Completed |
| Healthy subjects                                                                 | DR                       | Aging and incidence of age-related diseases including cancer | Males and females between 21 - 50 years | <b>CALERIE: Comprehensive Assessment of Long-Term Effects of Reducing Intake of Energy:</b> 25% DR for two years                                               | NCT00427193           | USA, 3 centers           | Completed |
| Healthy, slightly overweight subjects                                            | DR                       | Aging and incidence of age-related diseases including cancer | Males and females between 25 - 50 years | <b>CALERIE (Tufts) - Comprehensive Assessment of Long-term Effects of Reducing Intake of Energy:</b> 10 % or 30 % DR for one year                              | NCT00099099           | USA, 3 centers           | Completed |
| Overweight or obese subjects with increased risk of developing colorectal cancer | DR                       | Energy balance                                               | Adult males and females >50 years       | <b>Energy Balance Interventions for Colorectal Cancer Prevention</b>                                                                                           | NCT00653484           | Tennessee, USA, 1 center | Completed |
| Obese subjects                                                                   | DR                       | Inflammation levels (and potentially breast cancer risk)     | Postmenopausal females                  | <b>Diet Induced Weight Loss to Reduce Inflammation in Obese Women:</b> diet of 800 kcal/day until 10% of initial baseline body weight was lost                 | NCT01699906           | New York, USA, 1 center  | Completed |
| Overweight or obese subjects                                                     | DR                       | Obesity-related health risks including cancer                | Adult males, overweight or obese        | <b>Nutrition and Energy Restriction for Cancer Prevention (HELENA):</b> Continuous 20 % DR or 25 % DR for two days per week combined with 5 days normal intake | NCT02449148           | Germany, 1 center        | Completed |

|                                                  |                                         |                                       |                                 |                                                                                                                                                                                                                                     |             |                      |                    |
|--------------------------------------------------|-----------------------------------------|---------------------------------------|---------------------------------|-------------------------------------------------------------------------------------------------------------------------------------------------------------------------------------------------------------------------------------|-------------|----------------------|--------------------|
| Subjects previously diagnosed with breast cancer | Reduced caloric intake + exercise       | Breast cancer recurrence              | Adult females                   | <b>Prevention of Breast Cancer Recurrence Through Weight Control, Diet, and Physical Activity Intervention (PREDICOP)</b>                                                                                                           | NCT02035631 | Spain, 5 centers     | Not yet recruiting |
| Moderately overweight subjects                   | DR                                      | Cancer risk                           | Males and females (35-65 years) | <b>Effect of Daily Calorie or Alternate-day Calorie Reductions on Risk for Cardiovascular Disease and Cancer (1072):</b> continuous DR or alternate-day DR for 3 months                                                             | NCT00467220 | California, 1 center | Completed          |
| Subjects with metabolic syndrome                 | Lifestyle intervention and/or metformin | Age-related diseases including cancer | Males and females (55-74 years) | <b>Metformin and Dietary Restriction to Prevent Age-related Morbid Events in People With Metabolic Syndrome (MeMeMe):</b> lifestyle intervention consists of moderate exercise and moderate reduction of calorie and protein intake | NCT02960711 | Italy, 1 center      | Unknown            |

<sup>a</sup> Study ID refers to clinical trials registered at [clinicaltrials.gov](https://clinicaltrials.gov)
